# Supplementary material
Source: publisher figshare collection journal article supplement (https://sage.figshare.com/ndownloader/files/23166722)
Supplement: Supplementary file 1 [file 23166722]

### Supplemental Appendix 3

#### Relative or absolute contraindications to reperfusion therapy, by treatment modality

|                                                | SL, Reduced Dose | SL, Full Dose | SL, All   | CDI       |
|------------------------------------------------|------------------|---------------|-----------|-----------|
| Patients, total, n                             | 58               | 28            | 86        | 26        |
| Relative or absolute contraindication to SL, n | 7(13.2%)         | 3(10.7%)      | 10(11.6%) | 17(65.4%) |

SL = systemic lysis; CDI = catheter-directed interventions

#### PERT referrals, by specialty

|                   |           |
|-------------------|-----------|
| PERT referrals, n | 87        |
| Hospitalist       | 38(43.7%) |
| ED                | 26(29.9%) |
| OSH               | 15(17.2%) |
| Intensivist       | 6(6.9%)   |
| IR                | 1(1.1%)   |
| Cardiologist      | 1(1.1%)   |

PERT = Pulmonary Embolism Response Team; ED = emergency department; OSH == outside hospital; IR = interventional radiology

#### Effect of CDI cases with complications or escalation of care on ICU and Hospital LOS

|                                | CDI, complications          | CDI, EOC                    | CDI, complications & EOC | CDI, all           |
|--------------------------------|-----------------------------|-----------------------------|--------------------------|--------------------|
| n                              | 3 (Catheter-directed Lysis) | 3 (Mechanical Thrombectomy) | 6                        | 26                 |
| ICU LOS, median (Q1 - Q3)      | 1.92 (0.66 - 6.01)          | 5.93 (1.73 - 11.9)          | 3.92 (1.73 - 6.01)       | 2.06 (1.77 - 7.83) |
| Hospital LOS, median (Q1 - Q3) | 6.01 (3.58 - 7.41)          | 9.43 (9.28 - 22.8)          | 8.34 (6.01 - 9.43)       | 7.51 (5.75 - 12.9) |

CDI = catheter-directed interventions; EOS = escalation of care; LOS = length of stay

#### Comparison of SL and CDI LOS, with and without CDI cases with complications or escalation of care

|                                   | SL, all          | CDI, all          | CDI, no EOS          | CDI, no complications | CDI, no EOS or complications |
|-----------------------------------|------------------|-------------------|----------------------|-----------------------|------------------------------|
| Number of cases                   | 86               | 26                | 23                   | 23                    | 20                           |
| ICU LOS (days), median (Q1 - Q3)  | 1.73 (1.08-2.09) | 2.09* (1.77-7.83) | 2.04* (1.81 - 6.92)  | 2.09* (1.81 - 8.48)   | 2.06* (1.85 - 7.83)          |
| Hospital LOS (days), median (IQR) | 4.70 (3.33-7.16) | 7.51* (5.75-12.9) | 7.41* (3.99 - 12.94) | 7.80* (5.75 - 14.68)  | 7.51* (4.87 - 13.81)         |

SL = systemic lysis; \*indicates statistical significance for the difference between CDI and SL LOS
